# Supplementary material for: Photoluminescence of silicon quantum dots in nanospheres
Source: Royal Society of Chemistry journal article supplement (doi:10.1039/c2nr32375c), 2012-01-01
Supplement: c2nr32375c.pdf [file c2nr32375c.pdf]

## Photoluminescence of Silicon Quantum Dots in Nanospheres

(Supporting Information)

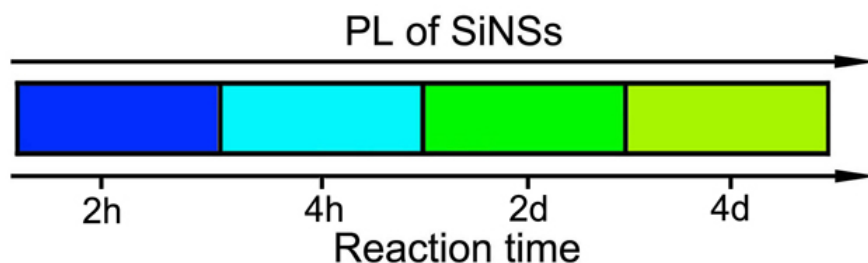

**Fig. S1** The relationship between tunable PL emission of SiNSs and the reaction time.

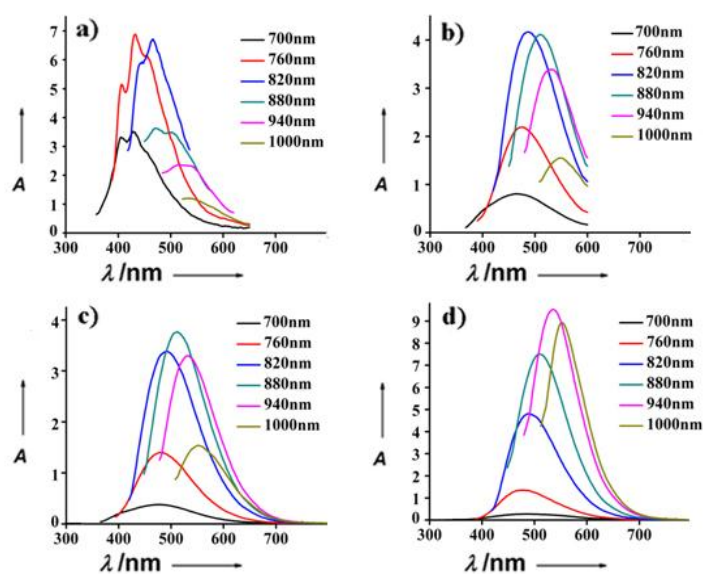

**Fig. S2** Up converted PL of SiNSs prepared with different reaction time: a) 2 h, b) 4 h, c) 2 d and d) 4 d.

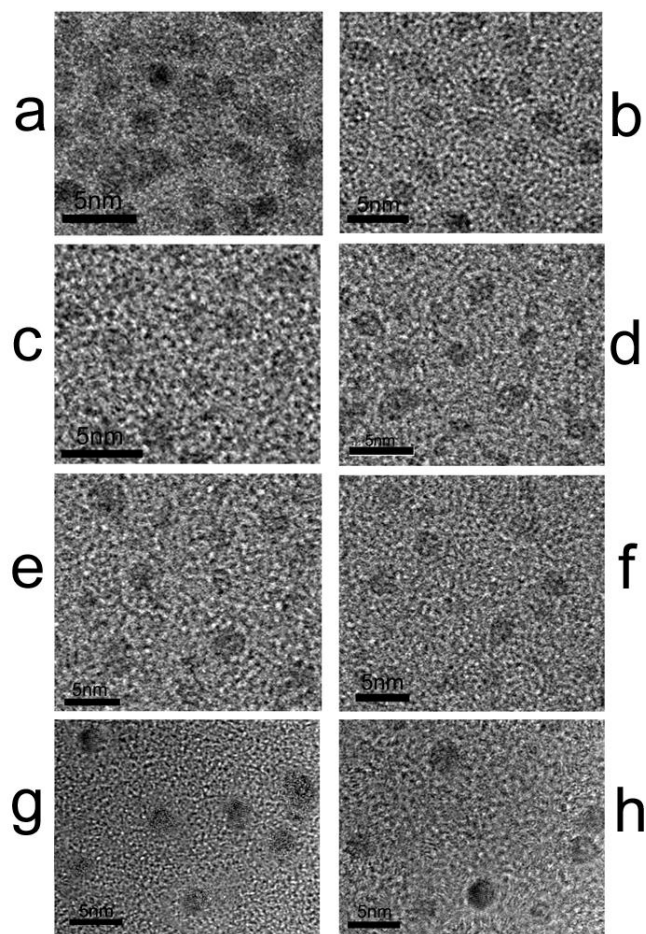

**Fig. S3** TEM images of SiNSs with different Si dots average spacing: a to h for spacing about 1.6, 2.5, 3.5, 4.6, 5.6, 6.9, 9.7, and 11.8 nm, respectively.

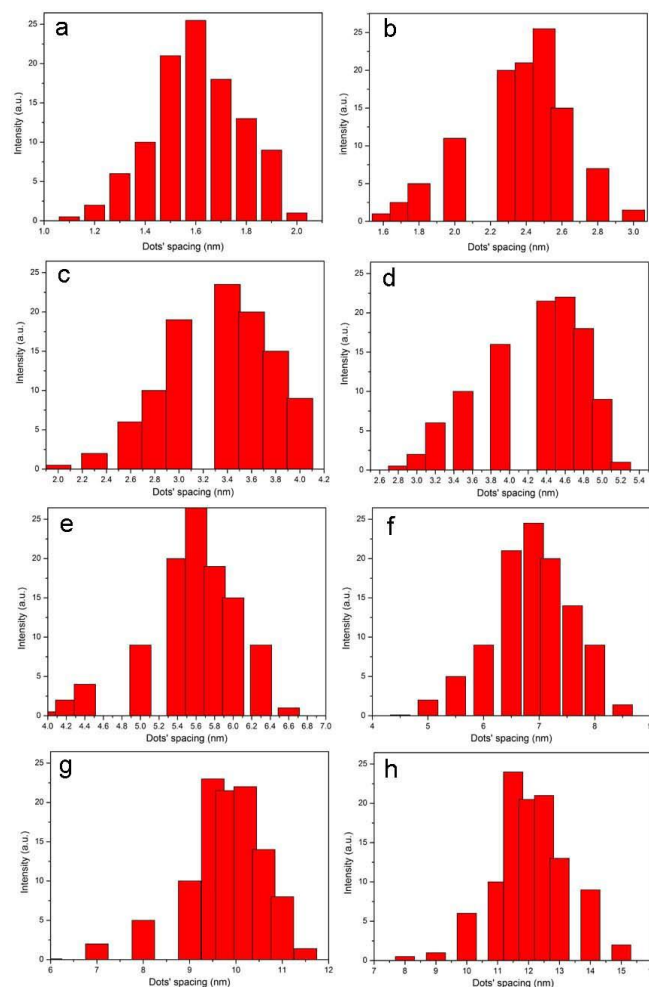

**Fig. S4** The histograms of dots spacing of SiNSs: a to h for average spacing about 1.6, 2.5, 3.5, 4.6, 5.6, 6.9, 9.7, and 11.8 nm, respectively.

The PL quantum yield test:

The quantum yield ( $\Phi$ ) of SiQDs and SiNSs were measured by comparing the integrated photoluminescence intensities and the absorbance values with the reference quinine sulfate or Rhodamine B. The quinine sulfate (literature  $\Phi = 0.54$ ) was dissolved in 0.1M  $\text{H}_2\text{SO}_4$  (refractive index  $\eta = 1.33$ ); Rhodamine B (literature  $\Phi = 0.97$ ) was dissolved in ethanol ( $\eta = 1.323$ ); SiQDs were dissolved in ethanol ( $\eta = 1.323$ ), and the SiNSs were dissolved in distilled water ( $\eta = 1.33$ ).

$$\Phi = \Phi_R \times \frac{I}{I_R} \times \frac{A_R}{A} \times \frac{\eta^2}{\eta_R^2}$$

Where  $\Phi$  is the quantum yield,  $I$  is the measured integrated emission intensity,  $\eta$  is the refractive index, and  $A$  is the optical density. The subscript R refers to the reference fluorophore of known quantum yield.
